# Supplementary material for: A Simple Near‐Infrared Fluorescent Probe for the Detection of Peroxynitrite
Source: PubMed Central journal article supplement (PMC6900745; doi:10.1002/open.201900301), 2019-12-09
Supplement: OPEN-8-1407-s001.pdf [file OPEN-8-1407-s001.pdf]

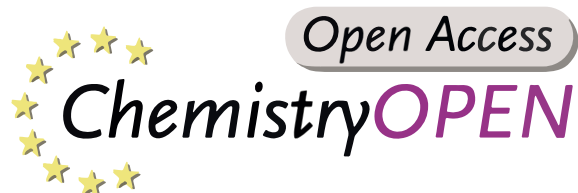

## Supporting Information

© Copyright Wiley-VCH Verlag GmbH & Co. KGaA, 69451 Weinheim, 2019

### **A Simple Near-Infrared Fluorescent Probe for the Detection of Peroxynitrite**

Luling Wu<sup>+</sup>, Xue Tian<sup>+</sup>, Hai-Hao Han, Jie Wang, Robin R. Groleau, Paramabhorn Tosuwan, Boontana Wannalarse, Adam C. Sedgwick, Steven D. Bull, Xiao-Peng He,<sup>\*</sup> and Tony D. James<sup>\*</sup> © 2019 The Authors. Published by Wiley-VCH Verlag GmbH & Co. KGaA. This is an open access article under the terms of the Creative Commons Attribution License, which permits use, distribution and reproduction in any medium, provided the original work is properly cited. An invited contribution to a Special Collection dedicated to Functional Supramolecular Systems

## Table of contents

|                                                                  |       |
|------------------------------------------------------------------|-------|
| <b>1. UV-Vis and fluorescence analysis</b> .....                 | S2    |
| <b>2. Generation of various ROS</b> .....                        | S3    |
| <b>3. Mass spectrometry analysis</b> .....                       | S4-S5 |
| <b>4. Detailed protocols for cell culture</b> .....              | S6    |
| <b>5. Fluorescence imaging in live cells and MTS assay</b> ..... | S6    |
| <b>6. Experimental</b> .....                                     | S7    |
| <b>7. NMR spectrum</b> .....                                     | S8-S9 |
| <b>8. References</b> .....                                       | S10   |
| <b>9. Author contributions</b> .....                             | S10   |

## 1. UV-Vis and fluorescence analysis

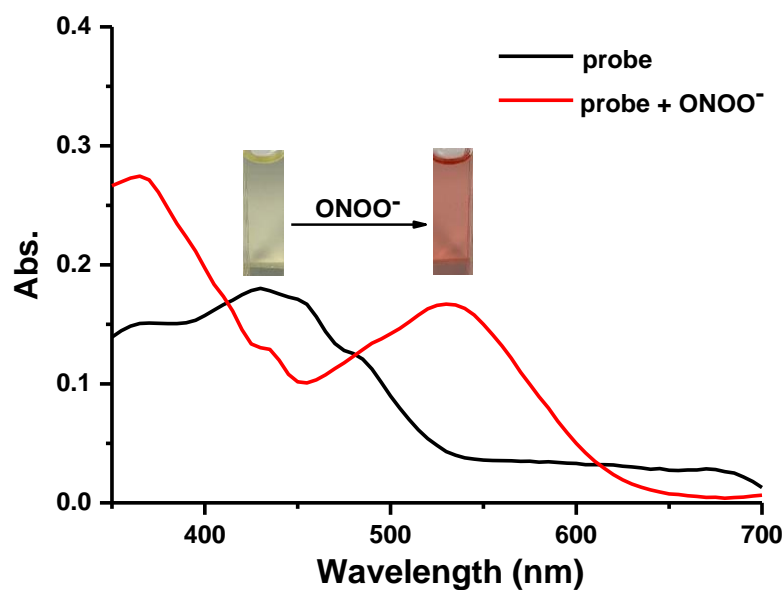

**Figure S1.** Absorption spectrum of probe **DCM-Bpin** (20 μM) with and without ONOO<sup>-</sup> (10 equiv.) in PBS buffer solution (containing 5% DMSO, pH = 7.40).

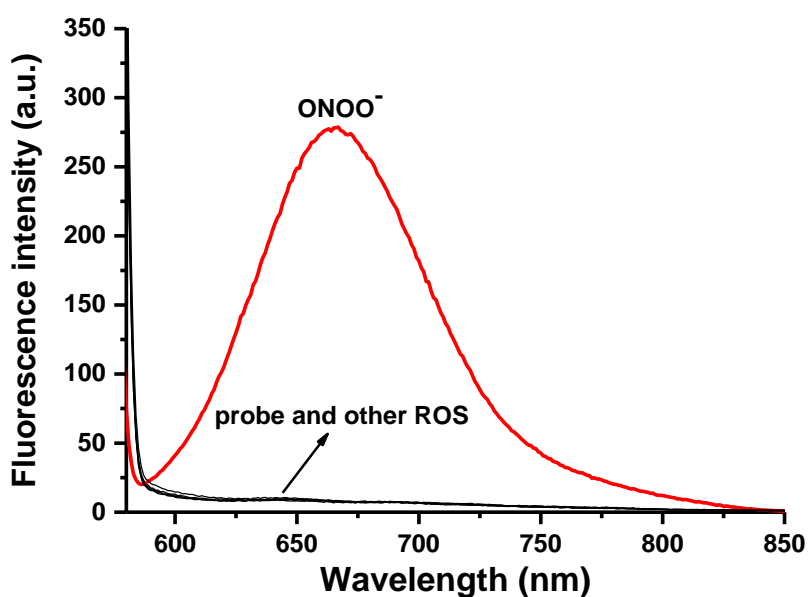

**Figure S2.** Fluorescence intensity changes of **DCM-Bpin** (10 μM) with addition of ONOO<sup>-</sup> (200 μM) measured after 5min, and various other ROS (500 μM) measured after 1 h in PBS buffer solution (containing 5% DMSO, pH = 7.40).  $\lambda_{ex}$  = 560 nm. Slit widths: ex = 10 nm, em = 20 nm.

## 2. Generation of various ROS

### **ROO<sup>•</sup>**

ROO<sup>•</sup> was generated from 2,2'-azobis (2-amidinopropane) dihydrochloride. AAPH (2, 2' azobis (2-amidinopropane) dihydrochloride, 1 M) was added into deionizer water, and then stirred at 37 °C for 30 min.

### **O<sub>2</sub><sup>•-</sup>**

Superoxide was generated from KO<sub>2</sub>. KO<sub>2</sub> and 18-crown-6 ether (2.5 eq) were dissolved in DMSO to afford a 0.25 M solution.

### **•OH**

Hydroxyl radical was generated by the Fenton reaction. To prepare •OH solution, hydrogen peroxide (H<sub>2</sub>O<sub>2</sub>, 10 eq) was added to Fe(ClO<sub>4</sub>)<sub>2</sub> in deionised water.

### **<sup>1</sup>O<sub>2</sub>**

<sup>1</sup>O<sub>2</sub> was generated by reacting H<sub>2</sub>O<sub>2</sub> (1 mM) with NaClO (1 mM). The solution of H<sub>2</sub>O<sub>2</sub> was added in one portion to the aqueous solution of NaClO and stir for 2 minutes, using the prepared solution immediately.

### **ONOO<sup>-</sup>**

0.6 M NaNO<sub>2</sub>, 0.6 M HCl, 0.7 M H<sub>2</sub>O<sub>2</sub> was added simultaneously to a 3 M NaOH solution at 0 °C. The concentration of peroxynitrite was estimated by using extinction co-efficient of 1670 M<sup>-1</sup> cm<sup>-1</sup> at 302 nm in a 0.5 M sodium hydroxide aqueous solutions.

### **ClO<sup>-</sup>**

The concentration of ClO<sup>-</sup> was determined from the absorption at 292 nm ( $\epsilon = 350 \text{ M}^{-1} \text{ cm}^{-1}$ ).

### **H<sub>2</sub>O<sub>2</sub>**

The concentration of H<sub>2</sub>O<sub>2</sub> was determined from the absorption at 240 nm ( $\epsilon = 43.6 \text{ M}^{-1} \text{ cm}^{-1}$ ).

### 3. Mass spectrometry analysis

**Compound Table**

| Compound Label         | RT (min) | Observed mass (m/z) | Neutral observed mass (Da) | Theoretical mass (Da) | Mass error (ppm) | Isotope match score (%) |
|------------------------|----------|---------------------|----------------------------|-----------------------|------------------|-------------------------|
| Cpd 1: C26 H23 B N2 O3 | 1.01     | 423.1881            | 421.1836                   | 421.1838              | -0.49            | 84.76                   |

Mass errors of between -5.00 and 5.00 ppm with isotope match scores above 60% are considered confirmation of molecular formulae

**Figure: Extracted ion chromatogram (EIC) of compound.**

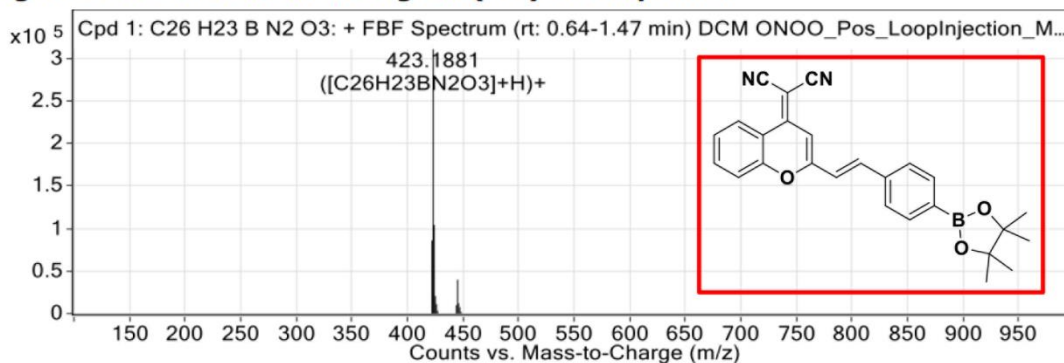

**Figure: Full range view of Compound spectra and potential adducts.**

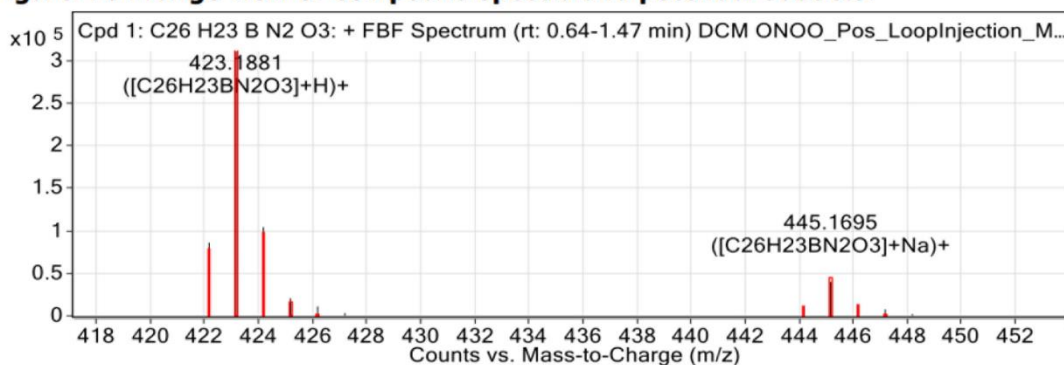

**Figure S3. HRMS of probe DCM-Bpin.**

### Compound Table

| Compound Label       | RT (min) | Observed mass (m/z) | Neutral observed mass (Da) | Theoretical mass (Da) | Mass error (ppm) | Isotope match score (%) |
|----------------------|----------|---------------------|----------------------------|-----------------------|------------------|-------------------------|
| Cpd 1: C20 H11 N2 O2 | 6.90     | 312.0927            | 311.0841                   | 311.0821              | 6.47             | 60.89                   |

Mass errors of between -5.00 and 5.00 ppm with isotope match scores above 60% are considered confirmation of molecular formulae

### Figure: Extracted ion chromatogram (EIC) of compound.

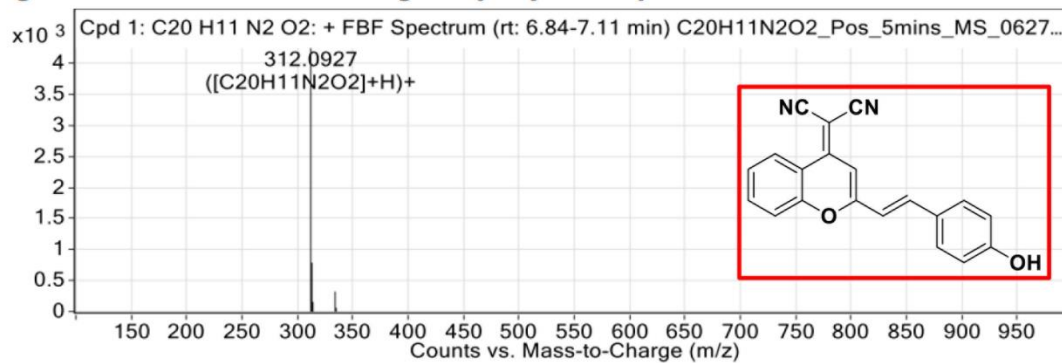

### Figure: Full range view of Compound spectra and potential adducts.

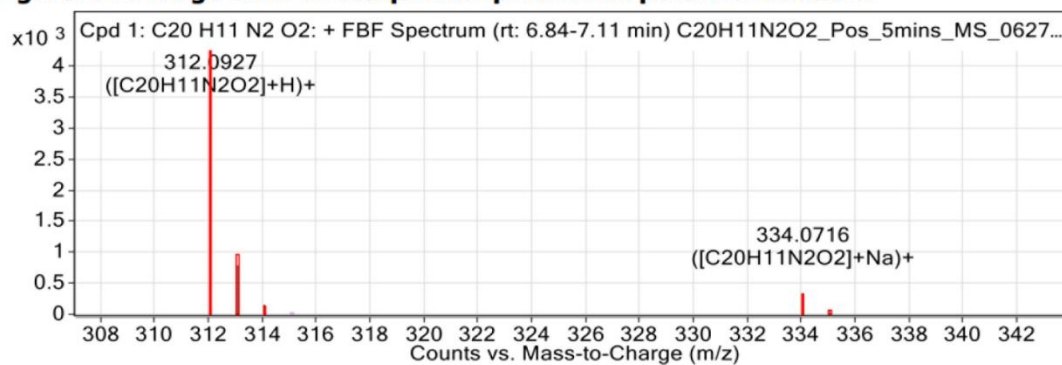

Figure S4. LC-MS of DCM-Bpin + ONOO<sup>-</sup>, showing cleavage of Bpin to the related phenol

#### 4. Detailed protocols for cell culture

Cell culture. HeLa cells were maintained in a Dulbecco's Modified Eagle's Medium (Invitrogen, Carlsbad, CA, USA) supplemented with 10% fetal bovine serum (Gibco, Grand Island, NY, USA) in a humidified atmosphere of 5% CO<sub>2</sub> and 95% air at 37 °C and split when the cells reached 90% confluency.

#### 5. Fluorescence imaging in live cells and MTS assay

**High-content fluorescence imaging.** Cells were seeded on a black 96-well microplate with optically clear bottom (Greiner bio-one, Germany) overnight. The cells were incubated with **DCM-Bpin** (20 μM) for 30 min, followed by incubation with SIN-1 (125 μM, 250 μM, 500 μM) or H<sub>2</sub>O<sub>2</sub> (125 μM, 250 μM, 500 μM) for 30 min. The cells' nuclei were stained with Hoechst 33342 (5 μg mL<sup>-1</sup>). The cells were then washed with PBS (phosphate buffered saline) three times. The fluorescence images (red) were recorded using an Operetta high content imaging system (Perkinelmer, US) at an excitation wavelength of 560–580 nm and an emission wavelength of 650–760 nm and quantified and plotted by Columbus analysis system (Perkinelmer, US). The excitation wavelength of fluorescence images (blue) was 360–400 nm and the emission wavelength was 410–480 nm.

**Cell viability assay.** Cells were plated on 96-well plates in growth medium overnight. The cells were treated with **DCM-Bpin** at different concentrations for 24 h. Then, the cell viabilities were determined through a standard MTS cell proliferation assay using 1% DMSO as the control.

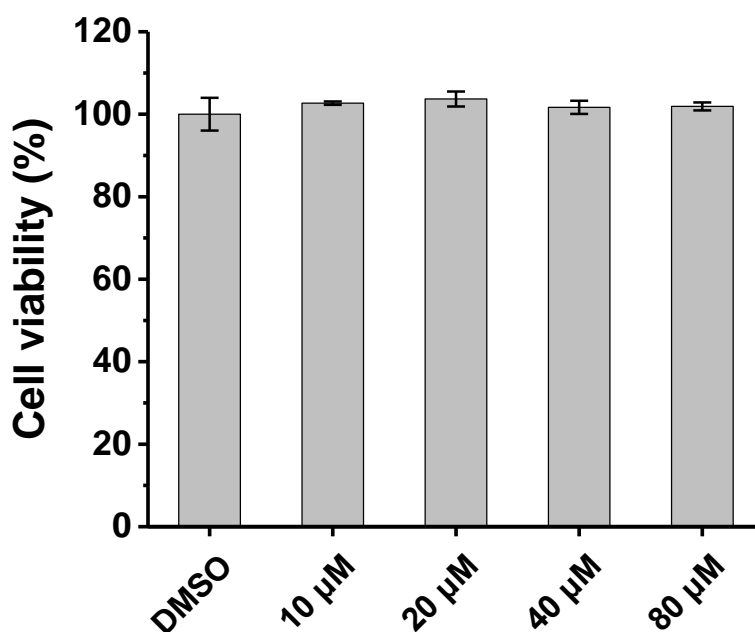

**Figure S5.** Cell toxicity of **DCM-Bpin** (from 0 to 80 μM) when the incubation time was 24 h. Error bar represents s.d.

## 6. Experimental

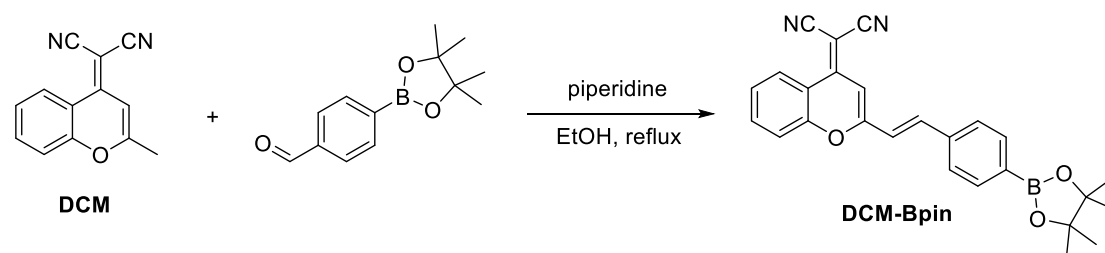

**Scheme S1.** Synthesis of target probe **DCM-Bpin**.

### Synthesis of 2-(2-methyl-4H-chromen-4-ylidene)malononitrile (DCM)

**DCM** was synthesized according to previously reported procedures. Characterisation data were consistent with previous literature reports.<sup>[1]</sup> M.p. 192 °C; <sup>1</sup>H NMR (500 MHz, CDCl<sub>3</sub>)  $\delta_H$  8.91 (dd,  $J = 8.2, 0.7$  Hz, 1H), 7.73-7.70 (m, 1H), 7.47-7.43 (m, 2H), 6.72 (s, 1H), 2.44 (s, 3H); <sup>13</sup>C NMR (125 MHz, CDCl<sub>3</sub>)  $\delta_C$  161.82 (s), 153.36 (s), 153.02 (s), 134.71 (s), 126.17 (s), 125.94 (s), 118.77 (s), 117.69 (s), 116.70 (s), 115.58 (s), 105.60 (s), 62.51 (s), 20.62 (s).

### Synthesis of (E)-2-(2-(4-(4,4,5,5-tetramethyl-1,3,2-dioxaborolan-2-yl)styryl)-4H-chromen-4-ylidene)malononitrile (DCM-Bpin)

**DCM** (0.10g, 0.50 mmol) and 4-(4,4,5,5-tetramethyl-1,3,2-dioxaborolan-2-yl)benzaldehyde (0.13g, 0.55 mmol) were added in 5 mL of ethanol absolute. Then piperidine (2.00 mmol) was added and the suspension was reflux for 4.5 h. The mixture was cooled and the solid precipitate was filtered and washed with cold ethanol to afford the title compound as a yellow solid (0.13 g, yield 62%). Characterisation data were consistent with previous literature reports.<sup>[2]</sup> M.p. 221 °C; <sup>1</sup>H NMR (500 MHz, CDCl<sub>3</sub>)  $\delta_H$  8.92 (dd,  $J = 8.4, 1.3$  Hz, 1H), 7.87 (d,  $J = 8.1$  Hz, 2H), 7.76-7.73 (m, 1H), 7.64 (d,  $J = 16.0$  Hz, 1H), 7.59 (d,  $J = 8.0$  Hz, 2H), 7.56 (dd,  $J = 8.4, 1.0$  Hz, 1H), 7.48-7.44 (m, 1H), 6.89 (t,  $J = 8.0$  Hz, 2H), 1.36 (s, 12H); <sup>13</sup>C NMR (125 MHz, CDCl<sub>3</sub>)  $\delta_C$  157.37 (s), 152.92 (s), 152.48 (s), 138.90 (s), 137.17 (s), 135.60 (s), 134.85 (s), 127.25 (s), 126.16 (s), 126.00 (s), 119.74 (s), 118.76 (s), 117.98 (s), 116.82 (s), 115.70 (s), 107.34 (s), 84.26 (s), 63.39 (s), 25.04 (s).



## 7. NMR spectra

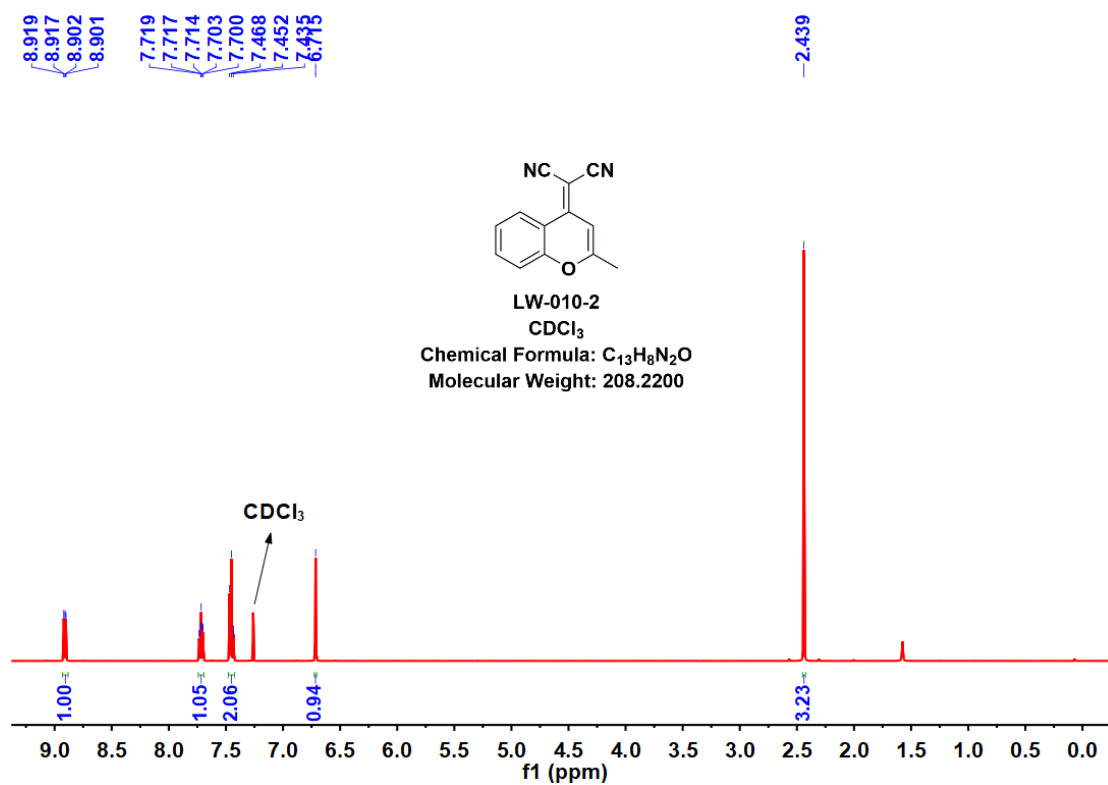

Figure S6. <sup>1</sup>H NMR of compound DCM.

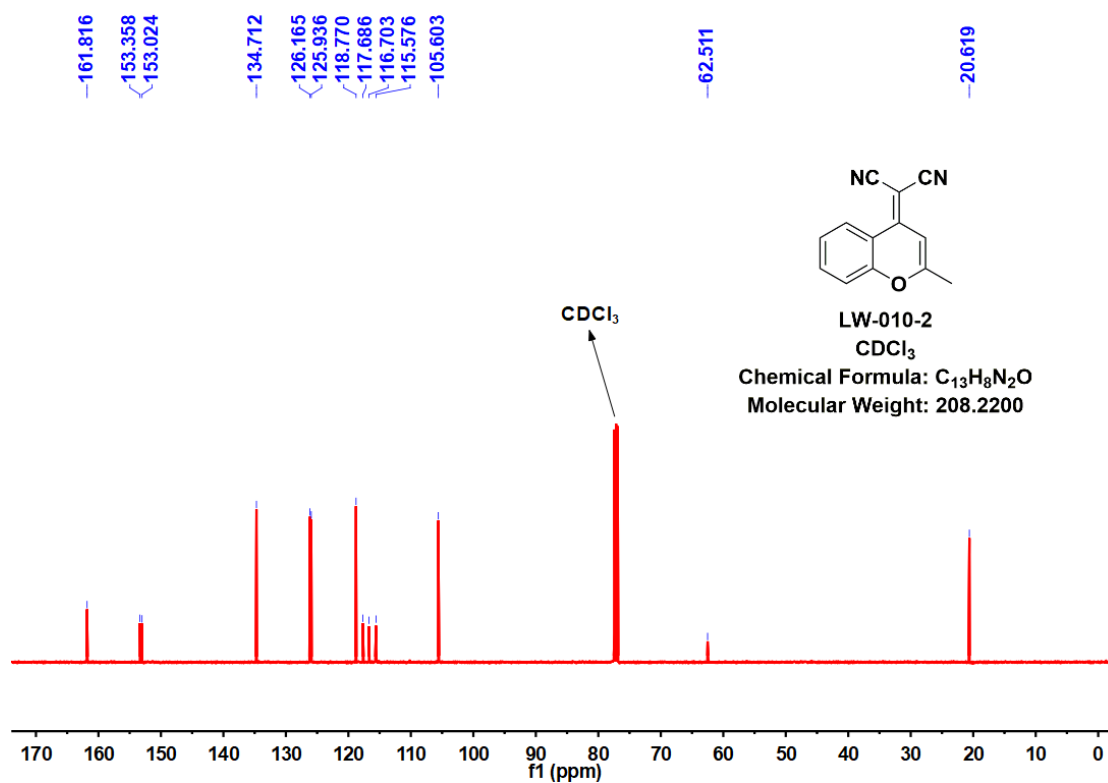

Figure S7. <sup>13</sup>C NMR of compound DCM.

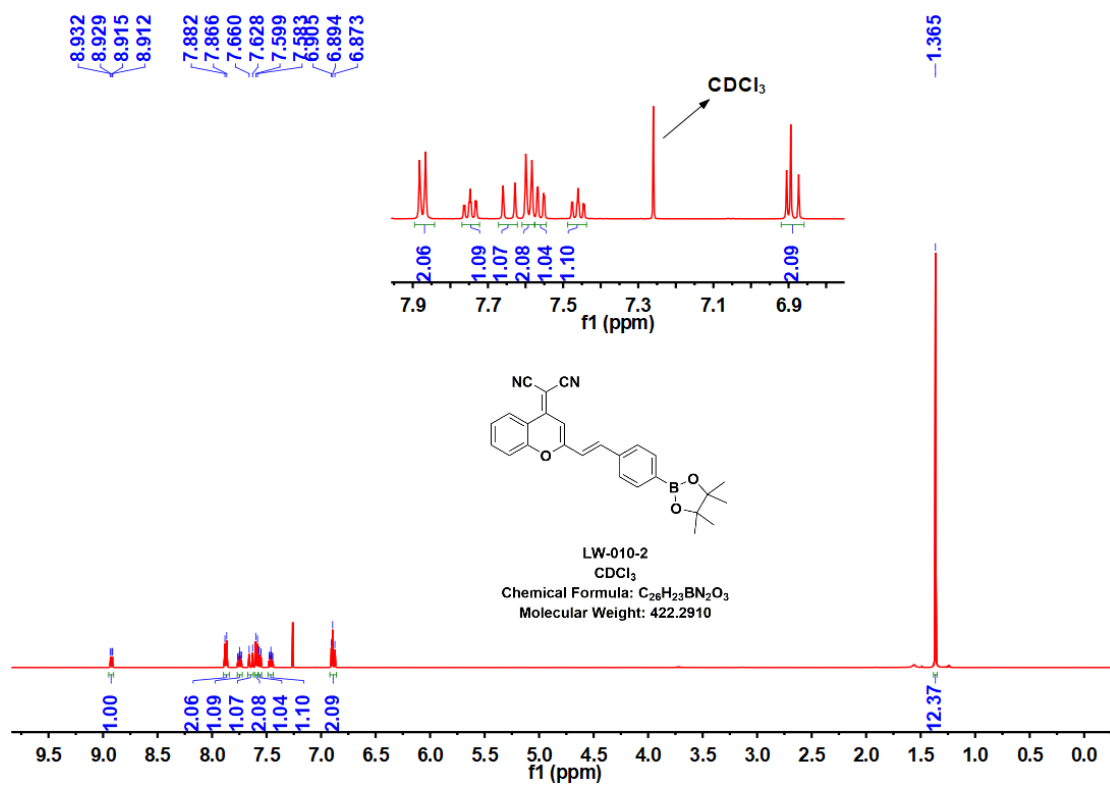

Figure S8. <sup>1</sup>H NMR of probe DCM-Bpin.

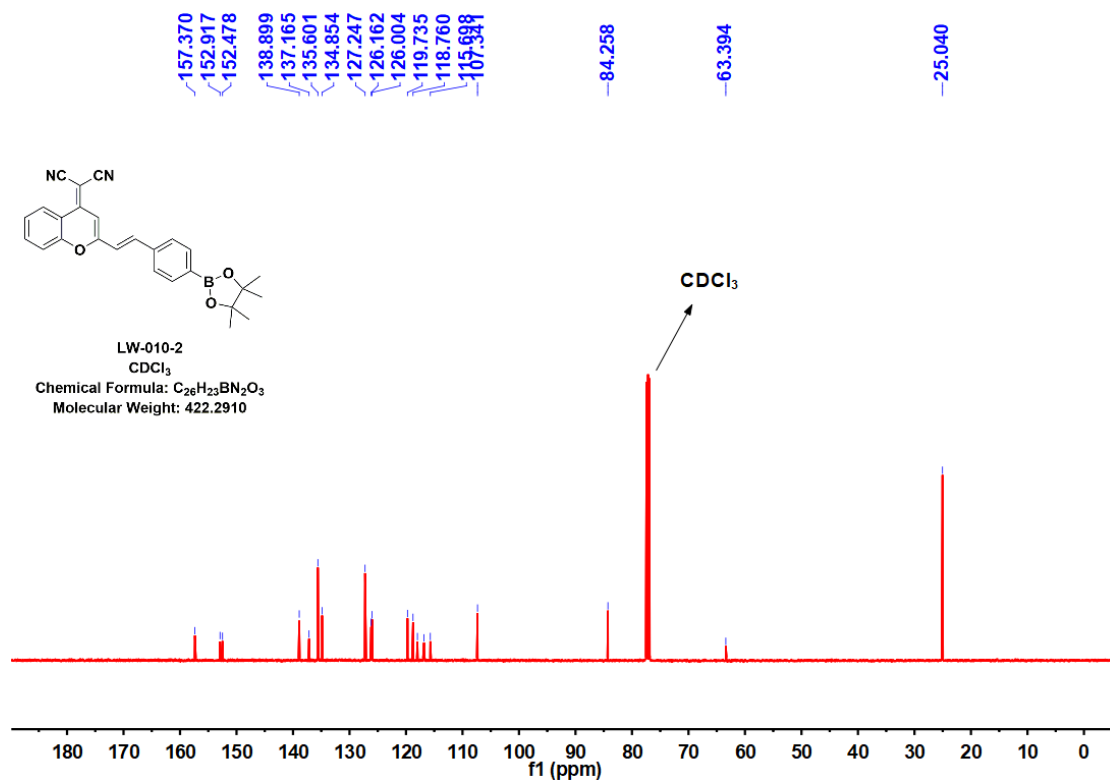

Figure S9. <sup>13</sup>C NMR of probe DCM-Bpin.

## 8. References

- [1] W. Sun, J. Fan, C. Hu, J. Cao, H. Zhang, X. Xiong, J. Wang, S. Cui, S. Sun, X. Peng, *Chem. Commun.*, **2013**, 49, 3890.
- [2] H. Wang, Y. Li, M. Yang, P. Wang, Y. Gu, *ACS Appl. Mater. Interfaces*, **2019**, 11, 7441.

## 9. Author contributions

Luling Wu – wrote the manuscript and synthesized the probe

Xue Tian – wrote the manuscript with Luling Wu and carried out the fluorescence experiments

Hai-Hao Han – carried out the cellular experiments

Jie Wang – helped with the cellular experiments under supervision of Hai-Hao Han

Robin R. Groleau – provided advice and reviewed and edited the manuscript

Paramabhorn Tosuwan – aided Xue Tian in fluorescence experiments

Boontana Wannalarse – supervisor of Paramabhorn Tosuwan

Adam C. Sedgwick – provided advice and reviewed and edited the manuscript

Steven D. Bull – supervisor of Luling Wu, Xue Tian and Robin R. Groleau

Xiao-Peng He – supervisor of Hai-Hao Han and Jie Wang

Tony D. James – lead supervisor
